# Supplementary material
Source: PubMed Central journal article supplement (PMC11419727)
Supplement: Kaneko_Supp.pdf [file Kaneko_Supp.pdf]

## Supplemental materials for

Deep End Kawasaki/Yokohama: A New Challenge for GPs in Deprived Areas in Japan. *Ann Fam Med.* 2024;22(5):456.

*Makoto Kaneko, MD, MClinSci, PhD<sup>1,2</sup>*

*Rei Kansaku, MD, PhD<sup>2,3,4</sup>*

*Yusuke Kanakubo, MD<sup>2,5</sup>*

*Aya Yumino, MD, Msc<sup>1,2,6</sup>*

<sup>1</sup>Department of Health Data Science, Yokohama City University, Yokohama, Japan

<sup>2</sup>Yokohama Kotobuki-cho Health and Welfare Exchange Center Clinic, Yokohama, Japan

<sup>3</sup>Department of Public Health, Juntendo University, Tokyo, Japan

<sup>4</sup>Institute for Multicultural Health, Tokyo, Japan

<sup>5</sup>Division of Clinical Epidemiology, Research Center for Medical Sciences, The Jikei University School of Medicine, Tokyo, Japan

<sup>6</sup>Department of Community and Global Health, School of International Health, Graduate School of Medicine, The University of Tokyo, Tokyo, Japan

---

*Conflicts of interest: authors report none.*

## Corresponding author

Makoto Kaneko

Department of Health Data Science, Yokohama City University

22-2, Seto, Kanazawa-ku

Yokohama, Kanagawa 236-0027, Japan

kanekom@yokohama-cu.ac.jp

---

## References

1. Blane DN, Sambale P, Williamson AE, Watt GCM. A change model for GPs serving deprived areas. *Ann Fam Med.* 2017;15(3):277. [10.1370/afm.2064](#)
2. Kaneko M. General practitioners at the deep end; Deep End International Bulletin No 10. Published Dec 2023. Accessed Jan 14, 2024. <https://www.gla.ac.uk/schools/healthwellbeing/research/generalpractice/deepend/international/>
3. Kudo K, Shinbori T. The government's vision for primary care in urban areas. [in Japanese]. *Sogoshinryo.* 2023;22(8):955-957.
4. Komidoku. Community doctor fellowship. Accessed Jan 14, 2024. <https://www.commudoc.com/>
5. Mediva. Medical reform from the patient's perspective. Accessed Jan 14, 2024. <https://mediva.co.jp/>
6. Community & Community Hospital Association. Accessed Jan 14, 2024. <https://cch-a.jp/>
7. Centre for Academic Primary Care, University of Bristol. New national survey on access to health care for street sex workers. Accessed Feb 24, 2024. <https://www.bristol.ac.uk/primaryhealthcare/news/2019/street-sex-workers.html> Kaneko

Supplemental Figure. Clerkship of a medical student in the clinic (in Japanese)

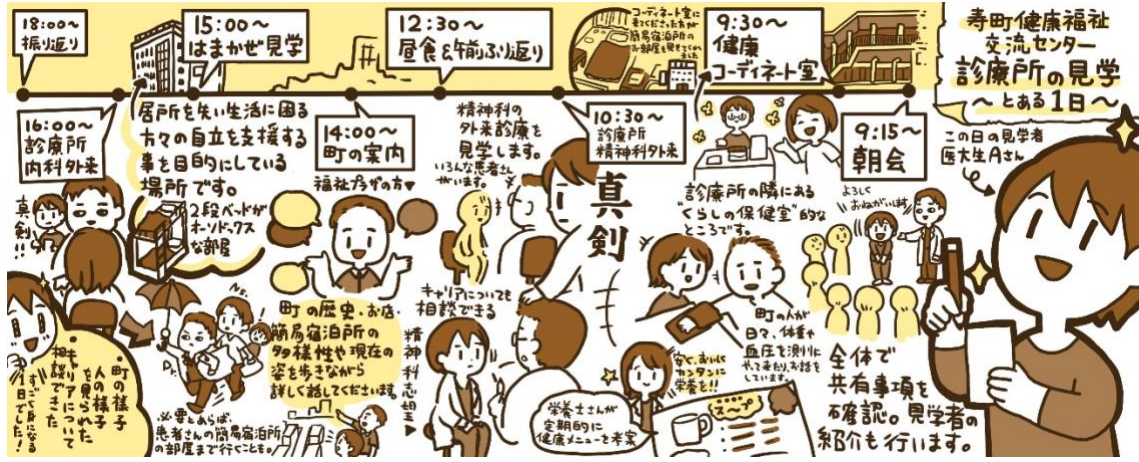

©2023 Makoto Kaneko
